# Supplementary material for: Chemical reactions of a CL-20 crystal under heat and shock determined by ReaxFF reactive molecular dynamics simulations
Source: Royal Society of Chemistry journal article supplement (doi:10.1039/d0cp02796k), 2020-01-01
Supplement: d0cp02796k1.pdf [file d0cp02796k1.pdf]

# Chemical Reactions of a CL-20 Crystal under Heat and Shock determined by ReaxFF Reactive Molecular Dynamics Simulations

Fuping Wang,<sup>[a]</sup> Lang Chen<sup>\*[b]</sup>, Deshen Geng,<sup>[b]</sup> Jianying Lu,<sup>[b]</sup> Junying Wu<sup>[b]</sup>

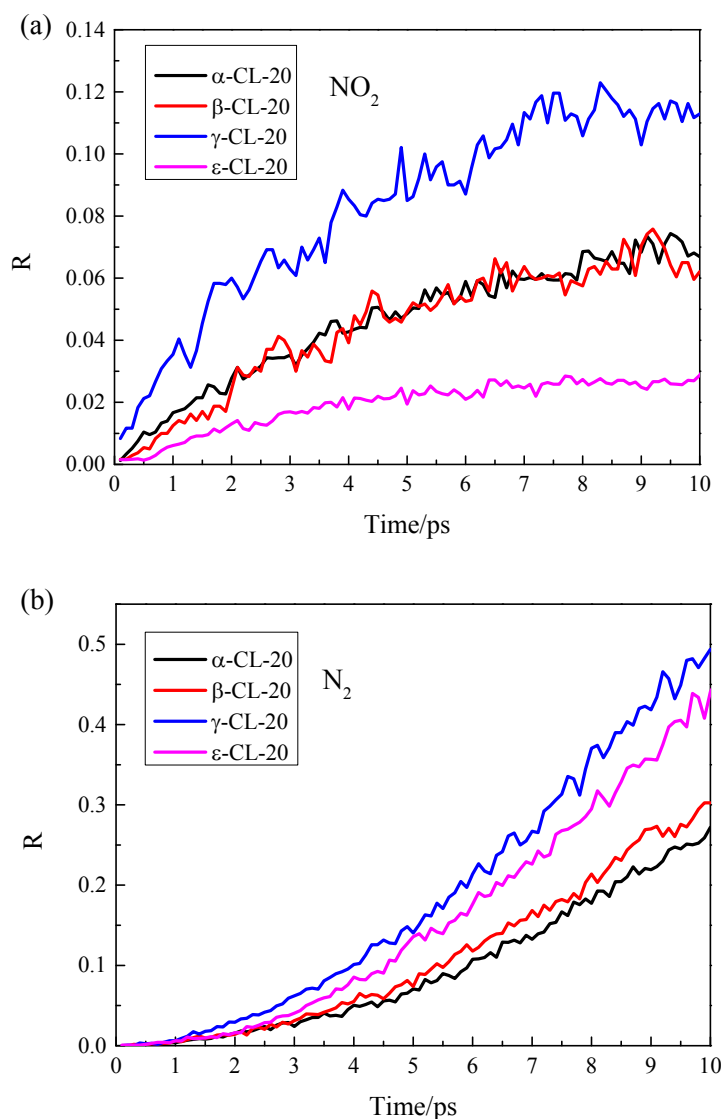

Fig.1 Evolution of generation rates of  $\text{NO}_2$  and  $\text{N}_2$  for  $\alpha$ ,  $\beta$ ,  $\gamma$ , and  $\epsilon$ -CL-20 crystals under the shock ( $R$  is the ratio of molecules numbers between the products and the reactants in the supercell)

---

\* The type of article: Research paper

Corresponding authors: Lang Chen

E-mail: chenlang@bit.edu.cn
